# Supplementary material for: Dauricine inhibits human pancreatic carcinoma cell proliferation through regulating miRNAs
Source: Royal Society of Chemistry journal article supplement (doi:10.1039/d1mo00156f), 2021-06-08
Supplement: d1mo00156f1.pdf [file d1mo00156f1.pdf]

| Number | Abbreviations | Expand name                                                   |
|--------|---------------|---------------------------------------------------------------|
| 1      | GO            | gene ontology                                                 |
| 2      | PPI           | Protein Protein Interaction                                   |
| 3      | GSEA          | Gene Set Enrichment Analysis                                  |
| 4      | STRING        | The online Search Tool for the Retrieval of Interacting Genes |
| 5      | ERK           | extracellular regulated protein kinases                       |
| 6      | Hh            | Hedgehog pathway                                              |
| 7      | VEGF          | vascular endothelial growth factor                            |
| 8      | p53           | tumor protein 53,                                             |
| 9      | BIRCS         | BIR-containing proteins                                       |
| 10     | NCAPG         | non-SMC condensin I complex subunit G                         |
| 11     | CDC45         | cell division cycle protein 45                                |
| 12     | MCM2          | minichromosome maintenance protein 2                          |
| 13     | NUSAP1        | Nucleolar and Spindle Associated Protein 1                    |
| 14     | PDCD4         | programmed cell death 4                                       |
| 15     | KIF23         | kinesin family member 23                                      |
| 16     | KIF11         | kinesin family member 11                                      |
| 17     | EXO1          | Exonuclease 1                                                 |
| 18     | PBK           | PDZ-binding kinase                                            |
| 19     | CENFP         | CENTromere Protein A                                          |
| 20     | KIF4A         | kinesin family member 4A                                      |
| 21     | PLK1          | Polo-like kinase 1                                            |
| 22     | SMC2          | Chromosomes 2                                                 |
| 23     | TROAP         | Trophinin-Associated Protein                                  |

|    |         |                                                                 |
|----|---------|-----------------------------------------------------------------|
| 24 | HJURP   | Holliday junction-recognizing protein                           |
| 25 | DEPDC1  | DEP domain containing 1                                         |
| 26 | ECT-2   | The guanine nucleotide-exchange factor                          |
| 27 | CDCA8   | The cell division cycle associated 8                            |
| 28 | PX2     | pannexin2 protein                                               |
| 29 | ANLN    | Anillin actin binding protein                                   |
| 30 | NDC80   | Nuclear division cycle 80                                       |
| 31 | KIF18A  | kinesin family member 18A                                       |
| 32 | FANCI   | Fanconi anemia core complex                                     |
| 33 | BUB1B   | mitotic checkpoint serine/threonine kinase B                    |
| 34 | BUB1    | mitotic checkpoint serine/threonine kinase                      |
| 35 | UBE2C   | ubiquitin-conjugating enzyme E2C                                |
| 36 | RNF2    | Ring finger protein 2                                           |
| 37 | RING1B  | Ring finger protein 1B                                          |
| 38 | PRC1    | Polycomb repressive complex 1                                   |
| 39 | AURKB   | Aurora kinase B                                                 |
| 40 | GEP-NEN | Gastroenteropancreatic neuroendocrine neoplasms                 |
| 41 | KLHL9   | The Kelch-like gene family 9                                    |
| 42 | MEX3C   | the mammalian homolog of RNA-binding protein muscle excess<br>3 |
| 43 | RNF6    | Ring finger protein 6                                           |
| 44 | DZIP3   | DAZ-interacting zinc finger 3                                   |
| 45 | CDC34   | cell division cycle 34                                          |
| 46 | FBXW4   | F-box/WD repeat-containing protein 4                            |

|    |        |                                                  |
|----|--------|--------------------------------------------------|
| 47 | Fbxl13 | F-box and leucine-rich repeat protein 13         |
| 48 | GPSM2  | G protein signaling modulator 2                  |
| 49 | NPY    | Neuropeptide Y                                   |
| 50 | GPER1  | G protein-coupled estrogen receptor              |
| 51 | RUNX3  | Runt-related transcription factor 3              |
| 52 | NPTX1  | Runt related transcription factor 3              |
| 53 | BNIP3  | Bcl-2/adenovirus E1B 19kDa interacting protein 3 |
| 54 | MDM2   | murine double minute 2                           |
| 55 | HMOX1  | haem oxygenase 1                                 |
| 56 | S100A1 | S100 Ca <sup>2+</sup> -binding protein A1        |
| 57 | MMP2   | matrix metalloproteinase 2                       |
| 58 | ND2    | NADH dehydrogenase subunit 2                     |
| 59 | ND4    | NADH dehydrogenase subunit 4                     |
| 60 | ND4L   | NADH dehydrogenase subunit 4L                    |
| 61 | ND5    | NADH dehydrogenase subunit 5                     |
| 62 | ATP6   | ATPase synthase 6                                |
| 63 | ATP8   | ATPase synthase 8                                |

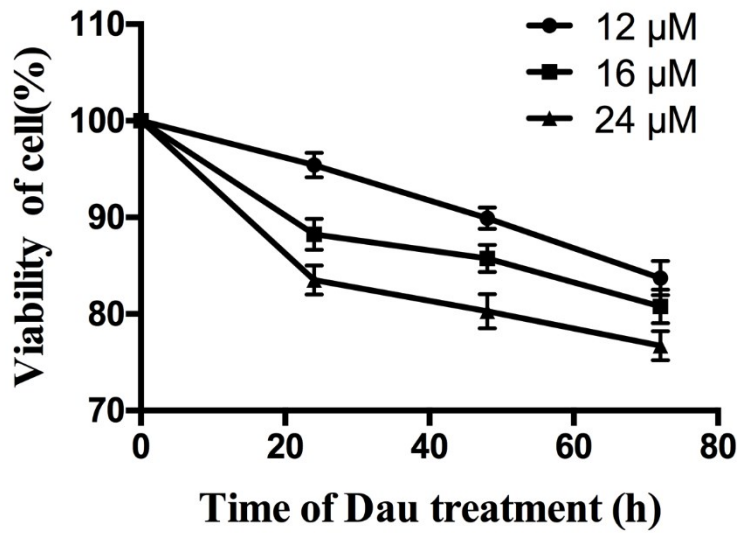

Figure 1. Effect of Dau on the growth of BxPC3 cells.

The proliferation was determined by MTT assay. BxPC3 cells were treated to increasing dosages of Dau for 24, 48 or 72h. Cell viability is expressed as a percentage of the control group (DMSO) ( $*P < 0.05$ )
